# Supplementary material for: Co3O4 Supported on Graphene-like Carbon by One-Step Calcination of Cobalt Phthalocyanine for Efficient Oxygen Reduction Reaction under Alkaline Medium
Source: MDPI journal article supplement (doi:10.3390/nano13071241), 2023-03-31
Supplement: s1 [file s1]

# Co<sub>3</sub>O<sub>4</sub> Supported on Graphene-like Carbon by One-Step Calcination of Cobalt Phthalocyanine for Efficient Oxygen Reduction Reaction under Alkaline Medium

## Section S1. Experimental section

### 1.1 Calculation of electron transfer number (n) for ORR

The Koutecky–Levich equation can be used for determining the electron transfer number (n):

$$\frac{1}{j} = \frac{1}{j_k} + \frac{1}{B\omega^{1/2}} \quad (1)$$

$$B = 0.2nFC_0D_0^{2/3}\nu^{-1/6} \quad (2)$$

Here,  $j$  is the measured current density,  $j_k$  is the kinetic current density and  $\omega$  is the rotating speed of electrode (rpm).  $B$  is determined from the slope of the Koutecky–Levich plots according to the Levich equation.  $n$  is electron transfer number per oxygen molecule,  $F$  is the Faraday constant ( $F = 96\,485\text{ C}\cdot\text{mol}^{-1}$ ),  $C$  is the concentration of O<sub>2</sub> in the 0.1 M KOH solution ( $C_{O_2} = 1.2\times 10^{-6}\text{ mol}\cdot\text{cm}^{-3}$ ),  $D$  is the diffusion coefficient of O<sub>2</sub> in the solution ( $D_{O_2} = 1.9\times 10^{-5}\text{ cm}^2\cdot\text{s}^{-1}$ ),  $\nu$  is the kinematic viscosity of the electrolyte ( $\nu=0.01\text{ cm}^2\cdot\text{s}^{-1}$ ), and the constant 0.2 is adopted when the rotation speed is expressed at rpm. According to Equations (1) and (2), the number of electrons transferred ( $n$ ) was calculated from the slopes of K–L plots to at potentials of 0.30 – 0.70 V. For RRDEs, the electron transfer number ( $n$ ) was determined by the following equations, the disk electrode was scanned at a rate of 10 mV·s<sup>-1</sup>, and the ring potential was constant at 1.6 V.

$$n = \frac{4I_D}{I_D + (I_R/N)} \quad (3)$$

Here,  $I_D$ ,  $I_R$ , and  $N$  are the disc current, the ring current, and the current collection efficiency of RRDE, respectively. In this equation,  $N = 0.43$ .

### Supplementary Figures

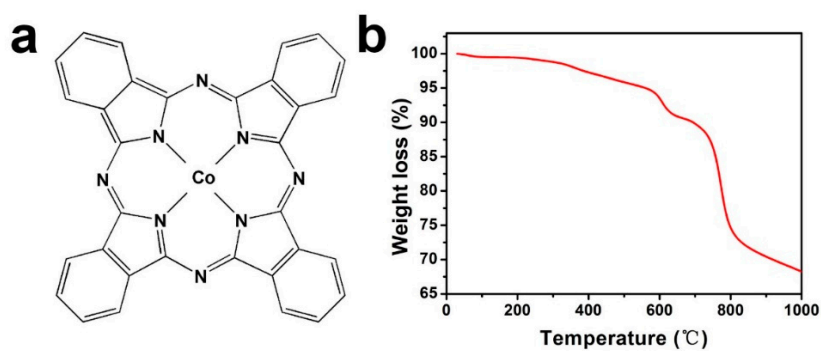

Figure S1. (a) The structure diagram of CoPc. (b) TGA curve of CoPc under  $N_2$ .

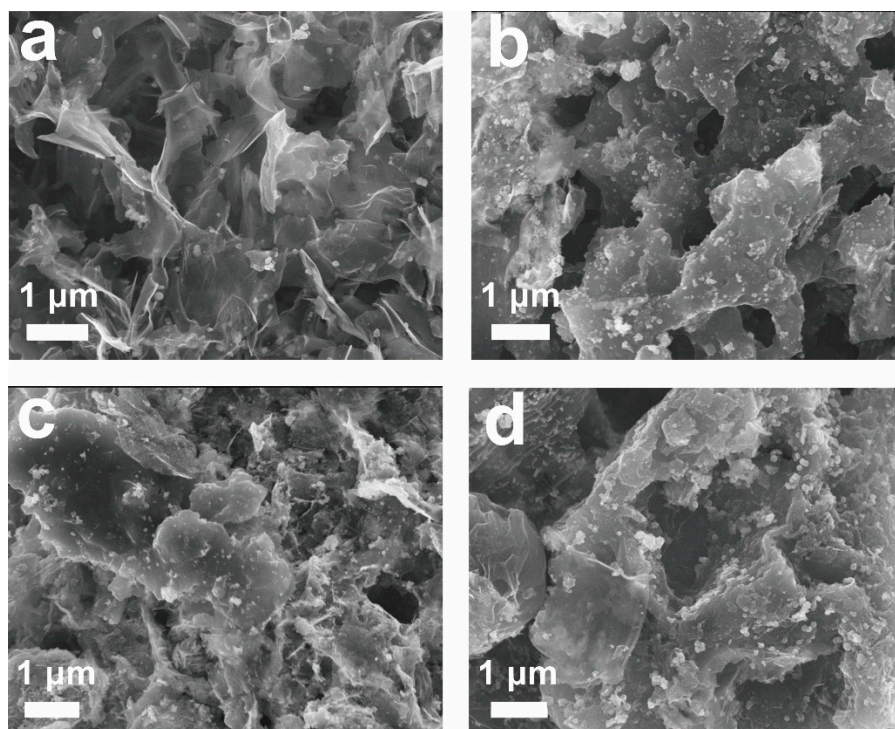

Figure S2. SEM images of (a)  $Co_3O_4/C-700$ , (b)  $Co_3O_4/C-800$ , (c)  $Co_3O_4/C-900$  and (d)  $Co_3O_4/C-1000$ .

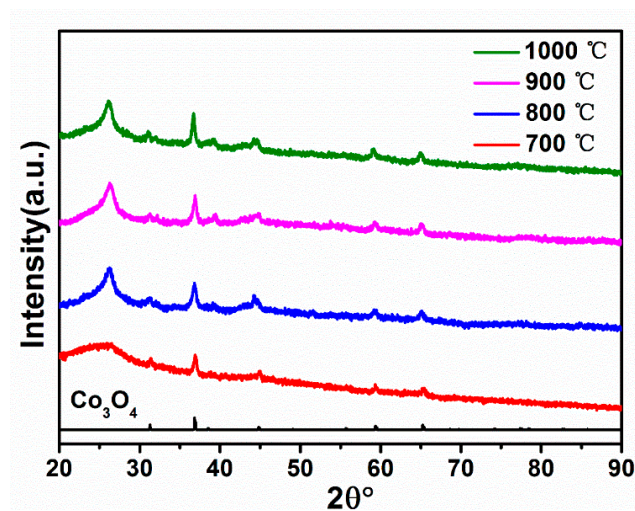

Figure S3. XRD patterns of  $\text{Co}_3\text{O}_4$  (JCPDS No. 43-1003),  $\text{Co}_3\text{O}_4/\text{C}$ -700,  $\text{Co}_3\text{O}_4/\text{C}$ -800,  $\text{Co}_3\text{O}_4/\text{C}$ -900 and  $\text{Co}_3\text{O}_4/\text{C}$ -1000 (black, red, blue, pink and green lines, respectively).

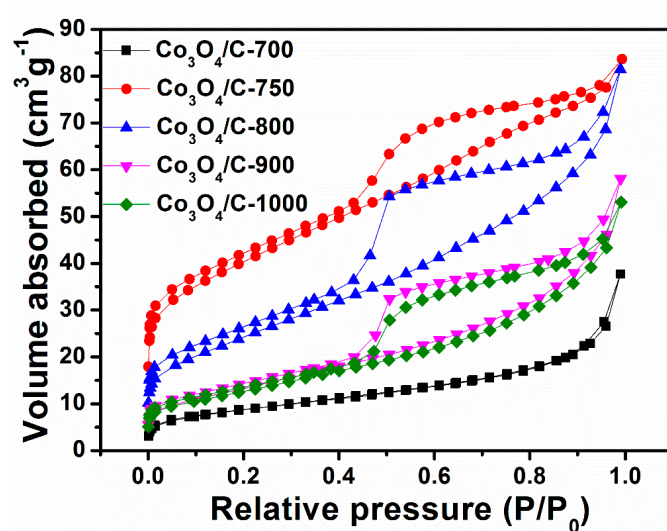

Figure S4.  $\text{N}_2$  adsorption-desorption isotherms of  $\text{Co}_3\text{O}_4/\text{C}$ -700,  $\text{Co}_3\text{O}_4/\text{C}$ -750,  $\text{Co}_3\text{O}_4/\text{C}$ -800,  $\text{Co}_3\text{O}_4/\text{C}$ -900 and  $\text{Co}_3\text{O}_4/\text{C}$ -1000 (black, red, blue, pink and green lines, respectively).

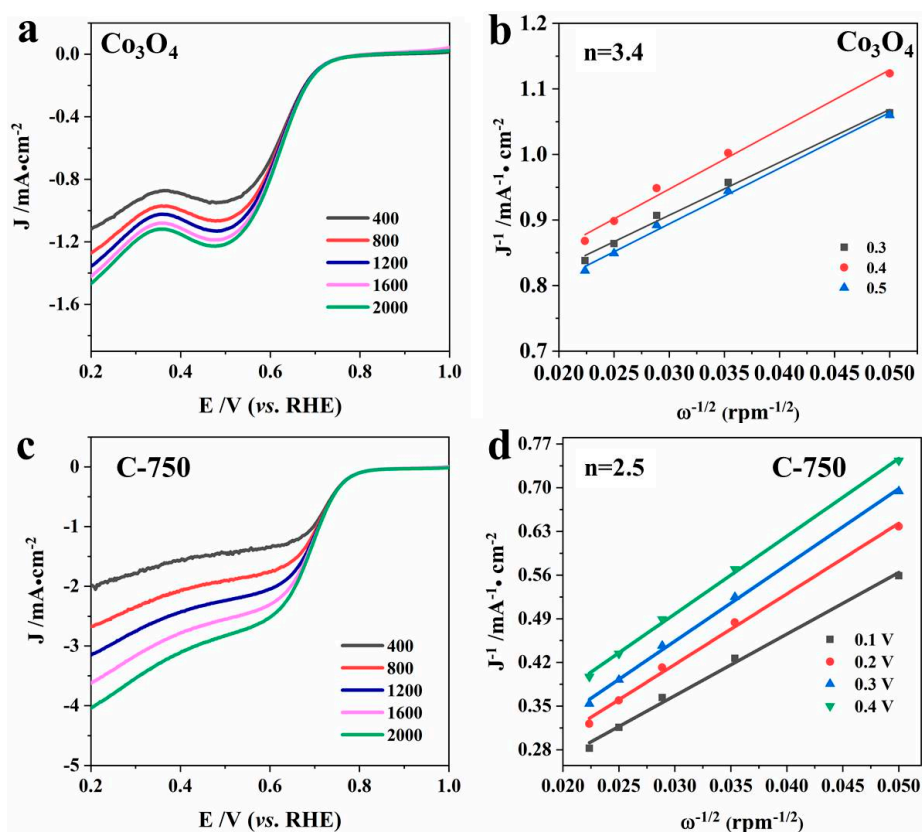

Figure S5. (a) LSV curves for  $\text{Co}_3\text{O}_4$  (Sinopharm Chemical Reagent Co., Ltd) at different rotation speeds (400–2000 rpm). (b) K–L plots of  $\text{Co}_3\text{O}_4$  at different electrode potentials (V vs. RHE). (c) LSV curves for carbon black (Sinopharm Chemical Reagent Co., Ltd) after 750 °C heat treatment at different rotation speeds (400–2000 rpm). (d) K–L plots of carbon black after 750 °C heat treatment at different electrode potentials (V vs. RHE).

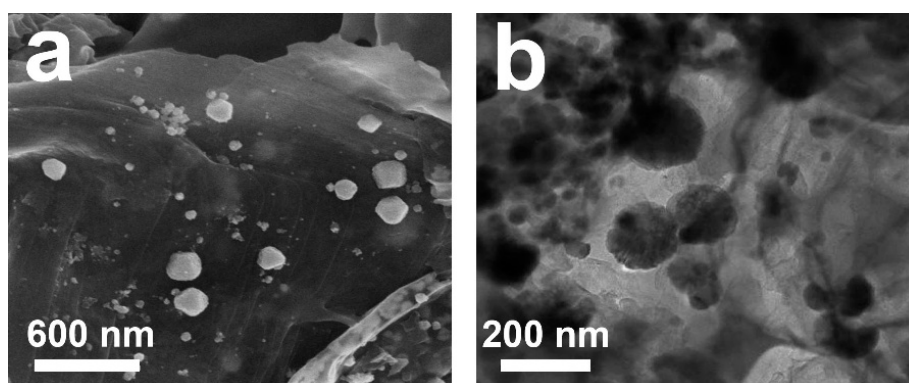

Figure S6. (a) SEM image and (b) TEM image of  $\text{Co}_3\text{O}_4/\text{C-750}$  after the ORR measurement.

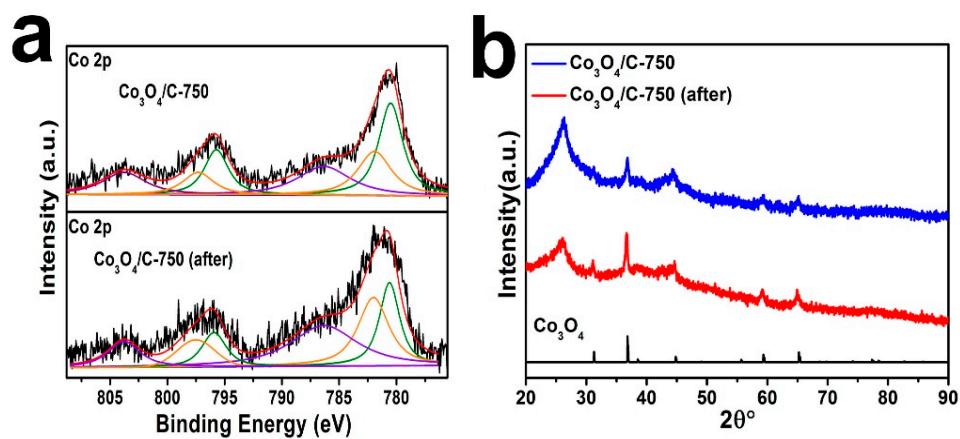

Figure S7. (a) High-resolution XPS spectra of Co 2p and (b) XRD patterns of  $\text{Co}_3\text{O}_4/\text{C-750}$  before and after the ORR measurement.
